1 BmCncC/keap1-pathway is involved in high-temperature induced metamorphosis  
2 regulation of silkworm, *Bombyx mori*

3

4

5 Jinxin Li<sup>1</sup>✉, Tingting Mao<sup>1</sup>✉, Zhengting Lu<sup>1</sup>✉, Mengxue Li<sup>1</sup>, Jianwei Qu<sup>1</sup>, Yilong Fang<sup>1</sup>, Jian  
6 Chen<sup>1</sup>, Hui Wang<sup>1</sup>, Xiaoyu Cheng<sup>1</sup>, Jiahuan Hu<sup>1</sup>, Yu Liu<sup>1</sup>, Ziyang Zhang<sup>1</sup>, Zhiya Gu<sup>1</sup>, Fanchi  
7 Li<sup>1,2\*</sup>, Bing Li<sup>1,2\*</sup>

8

9 1 School of Basic Medicine and Biological Sciences, Soochow University, Suzhou, Jiangsu  
10 215123, P.R. China.

11 2 Sericulture Institute of Soochow University, Suzhou, Jiangsu 215123, P.R. China

12

13 ✉These authors contributed equally to this work.

14

15 \*Correspondence should be addressed to:

16 B. Li, Ph.D.

17 Fax: +86 512 65880262

18 E-mail: lib@suda.edu.cn

19

## 20 Abstract

21

22 The global warming has affected the growth, development and reproduction of insects. However,  
23 the molecular mechanism of high temperature stress-mediated metamorphosis regulation of  
24 lepidopteran insect has not been elucidated. In this study, the relationship between the insect  
25 developmental process and endogenous hormone level was investigated under high temperature  
26 (36 ° C) stress in *Bombyx mori* (*B. mori*). The results showed that the duration of 5<sup>th</sup> instar larvae  
27 were shortened by  $28 \pm 2$  h, and the content of 20E was up-regulated significantly after 72 h of  
28 high temperature treatment, while the transcription levels of 20E response genes *E93*, *Br-C*, *USP*,  
29 *E75* were up-regulated 1.35, 1.25, 1.28, and 1.27-fold, respectively. The high temperature  
30 treatment promoted the phosphorylation level of Akt and the downstream BmCncC/keap1  
31 pathway was activated, the transcription levels of 20E synthesis-related genes *cyp302a1*,  
32 *cyp306a1*, *cyp314a1* and *cyp315a1* were up-regulated by 1.12, 1.51, 2.17 and 1.23-fold,  
33 respectively. After treatment with double stranded RNA of BmCncC (dsBmCncC) in BmN cells,  
34 the transcription levels of *cyp302a1* and *cyp306a1* were significantly decreased, whereas  
35 up-regulated by 2.15 and 1.31-fold, respectively, after treatment with CncC activator Curcumin.  
36 These results suggested that BmCncC/keap1-mediated P450 genes (*cyp302a1*, *cyp306a1*)  
37 expression resulted in the changes of endogenous hormone level, which played an important role  
38 in the regulation of metamorphosis under high temperature stress. Studies provide novel clues for  
39 understanding the CncC/keap1 pathway-mediated metamorphosis regulation mechanism in  
40 insects.

41

## 42 Author Summary

43

44 Mammalian nuclear transcription factor Nrf2 (NF-E2-related factor 2) plays an important role in  
45 the stress response of cells. CncC is a homolog of mammalian Nrf2 in insect, regulating the genes  
46 expression of insect antioxidant enzymes and cytochrome P450 detoxification enzyme. Evidence  
47 suggests that the CncC/Keap1 pathway also plays an important role in regulating insect  
48 development. Here, we investigated the regulatory mechanism between the CncC/Keap1 pathway  
49 and metabolism of silkworm hormones in Lepidoptera. We found that high temperature induction  
50 accelerated the development of silkworm, the ecdysone content and related metabolic genes in  
51 hemolymph were significantly up-regulated, the CncC/Keap1 pathway was activated, and the  
52 expression of *BmCncC* was significantly increased, indicating that the CncC/Keap1 pathway plays  
53 an important role in this process. The expression of *cyp302a1* and *cyp306a1* was significantly  
54 decreased by RNA interference with *BmCncC*, which indicated that CncC in silkworm had a  
55 regulatory relationship with downstream 20E synthetic gene. In summary, the results indicate that  
56 the CncC/Keap1 pathway plays an important role in regulating hormone metabolism in silkworm,  
57 providing a basis for further study of the relationship between CncC/Keap1 pathway and  
58 development in insects.

59

60

## 61 Introduction

62

63 The global warming resulted from greenhouse-effect adversely affects the ecosystems and

64 survival of organisms, changing the living habitats and causing deterioration of the ecological  
65 environment [1, 2]. Insects are the most abundant species on earth and play an important role in  
66 the balance of ecosystems and the human agroforestry economy [3]. Insects are  
67 temperature-variable animals that are extremely sensitive to environmental changes. The high  
68 temperature environment directly affects the growth and development of insects, changing the  
69 biological characteristics, reproductive ability and life span [4,5,6]. Silkworm (*Bombyx mori*)  
70 belongs to the Lepidoptera and is an important economic insect [7, 8] which is susceptible to high  
71 temperature environment during rearing, resulting in reduction of survival rate, cocoon rate, and  
72 pupa yield [9,10]. The molecular mechanism of high temperature-mediated interaction between  
73 metamorphosis processes and endogenous hormone metabolism has not been elucidated.

74

75 The mammalian Nrf2 (nuclear factor erythroid 2 related factor 2)/Keap1 (Kelch-like  
76 ECH-associated protein 1) pathway regulates intracellular redox potential, metabolic  
77 detoxification, enhances cell resistance and delays aging [11,12]. Under stress conditions, Nrf2  
78 induces the expression of antioxidant and detoxification enzyme genes by selectively binding to  
79 the antioxidant regulatory element (ARE) element in the promoter region to protect the cells  
80 against external stress [13, 14]. CncC (cap 'n' collar isoform-C) is the homolog of Nrf2 in insects,  
81 which plays an important role in metabolic detoxification and antioxidant enzyme genes  
82 expression [15]. The cytochrome P450 family genes in insects are mainly involved in  
83 detoxification of plant toxins and exogenous chemicals, which are related to insecticides  
84 resistance, and also play important role in biosynthesis of insect hormones such as 20E and  
85 pheromone et. [16]. Inhibition of CncC gene expression can change the developmental process of  
86 *Leptinotarsa decemlineata* [17], suggesting that CncC plays an important role in the insect  
87 metamorphosis. The P450 family genes in silkworm are divided into four subfamilies according to  
88 their homology: CYP2, CYP3, CYP4 and mitochondrial P450 [18], and the Hollween family  
89 genes *cyp302a1*, *cyp306a1*, *cyp314a1* and *cyp315a1* are mainly involved in 20E synthesis [19]. In  
90 silkworm, whether the P450 family Hollween genes are regulated by the BmCncC/keap1 pathway  
91 under high temperature stress have not been reported.

92

## 93 **Results**

94

### 95 **Effects of HT stress on the development and vitality of silkworm**

96

97 The results indicate that high temperature treatment resulted in smaller body size of larvae and  
98 transparent epidermis (Fig 1A), the characteristics and behavior of mature silkworm larvae were  
99 observed either. In addition, the larvae maturity time was advanced  $28 \pm 2$  h in average and mostly  
100 were concentrated around 144 h to 168 h (Fig 1C), indicating that high temperature treatment  
101 shortens the developmental duration of larvae. Furthermore, the vitality and pupation rate in high  
102 temperature group was reduced by 0.85 and 0.76-fold of the control group, respectively (Fig 1B  
103 and D), indicating that high temperature treatment reduced the vitality of the silkworm.

104

### 105 **The effect of HT stress on endogenous hormone and its metabolism-related genes expression**

106

107 The content of JH in hemolymph was reduced by 0.63-fold at 72 h after high temperature

108 treatment (Fig 2A), and the mRNA levels of the JH metabolism genes *Met*, *JH3* and *Kr-h1* were  
109 down-regulated by 0.75, 0.77, and 0.54-fold, respectively (Fig 2C). In addition, the content of 20E  
110 was increased by 1.86-fold after 72 h treatment, and the expression of 20E response genes *USP*,  
111 *Br-C*, *E75* and *E93* was up-regulated by 1.76, 1.35, 2.94 and 1.79-fold, respectively (Fig 2D).  
112 These results indicated that high temperature treatment changed the level of endogenous hormone  
113 in hemolymph.

114

### 115 **High temperature stress activated Akt/BmCncC/Keap1 pathway and induced expression of** 116 **20E-synthetic genes**

117

118 The mRNA levels of BmCncC and Maf were up-regulated by 1.89 and 1.32-fold, and keap1  
119 was down-regulated by 0.85-fold. The transcription levels of upstream genes PI3K and Akt was  
120 up-regulated significantly by 1.53 and 2.59-fold, respectively. Western blot analysis showed that  
121 the protein levels of Akt, p-Akt and BmCncC were up-regulated by 1.45, 1.56 and 1.32-fold,  
122 while the protein level of Keap1 was down-regulated by 0.76-fold, respectively. Furthermore, the  
123 mRNA levels of 20E-biosynthesis genes *cyp302a1*, *cyp306a1*, *cyp314a1*, and *cyp315a1* were  
124 significantly up-regulated, which was 1.12, 1.51, 2.17, and 1.23-fold, respectively (Fig 3A). The  
125 results indicated that high temperature treatment activated the Akt/BmCncC/keap1 pathway and  
126 induced the expression of downstream 20E biosynthesis genes.

127

### 128 **Regulation of downstream P450 genes by BmCncC**

129

130 The mRNA levels of *cyp302a1* and *cyp306a1* in BmN cells were significantly down-regulated  
131 by 0.46 and 0.78-fold after treatment with dsBmCncC for 24 h. In contrast, after treatment with  
132 CncC activator Curcumin for 24 h, the mRNA levels of *cyp302a1* and *cyp306a1* were  
133 up-regulated by 2.15 and 1.31-fold, respectively (Fig 4). The transcriptional levels of *cyp314a1*  
134 and *cyp315a1* were non-significantly changed after treatment (Fig 4). These results indicated that  
135 BmCncC plays an important role in regulation of *cyp302a1* and *cyp306a1* genes.

136

### 137 **Discussion**

138

139 The high temperature environment caused by climate warming resulted in the deterioration of  
140 the ecological environment and affects the growth and development of animals and plants [20].  
141 The elevate in temperature can increase the annual generations of insects in the growing season,  
142 affecting the growth and development of insects [21]. Studies have shown that high temperature  
143 stress can reduce the vitality, body weight, and cocoon shell rate of *B. mori*, and promote the  
144 expression of stress-related genes and CSP (chemosensory protein) genes [10]. In this study, the  
145 larva epidermis became transparent and showed the characteristics of mature larva after high  
146 temperature induction (Fig 1A), the survival and pupation rate of silkworm were significantly  
147 decreased (Fig 1D), which was in consistent with previous studies [10]. BmCncC/keap1 pathway  
148 plays an important role in response to oxidative stress and regulation of antioxidative and  
149 detoxification genes expression [22]. Whether this pathway involved in metamorphosis processes  
150 and regulates ecdysone-synthesis P450 genes in silkworm have not been reported. We found that  
151 the duration of 5<sup>th</sup> instar larva was shortened and the maturity time was advanced and relatively

152 concentrated after high temperature induction (Fig 1C), indicating that the high temperature  
153 promoting the development of silkworm. We also investigated the relationship between the 20E  
154 synthesis-related P450 genes and BmCncC/keap1 pathway by alternating the endogenous  
155 hormone levels under high temperature induction.

156 The steroid hormone ecdysone and JH coordinated to regulate the development of insects in an  
157 opposite way. JH treatment can prolong the duration of larva and enlarge the body size [23]. In the  
158 study, the content of JH and the transcriptional levels of response genes *Met*, *JH3*, and *Kr-h1* were  
159 significantly down-regulated after high temperature treatment (Fig 2A and Fig 2C). The *JH3* and  
160 *Met* genes play an important role in the JH signaling cascade [24]. *Kr-h1* can maintain *B. mori*  
161 larval state by controlling 20E content mediated by inhibition of steroidogenic enzymes genes  
162 transcription [25]. The 20E content was increased significantly after high temperature treatment,  
163 and the transcriptional levels of 20E metabolism-related genes *E93*, *Br-C*, *USP* and *E75* were  
164 significantly up-regulated (Fig 2D). Previous studies shown that treatment silkworm with 20E at  
165 5<sup>th</sup> instar larva can accelerate the development and promote larvae maturation [26]. *E93* gene  
166 promotes the development of silkworm and induces the expression of downstream 20E response  
167 genes, including *Br-C*, *USP* and *E75*, that plays important role in 20E signal cascade [27]. The  
168 results suggest that high temperature stress alternated the normal level of endogenous hormone,  
169 and the significant up-regulation of 20E content and response-genes under high temperature  
170 induction maybe one of the reasons for the accelerated development of silkworm.

171

172 Hollween genes belongs to the insect P450 genes family play an important role in the synthesis  
173 of 20E [28]. In this study, the transcription levels of 20E-synthesis genes (*cyp302a1*, *cyp306a1*,  
174 *cyp314a1*, *cyp315a1*) were significantly up-regulated after high temperature induction (Fig 3A).  
175 Studies shown that treatment silkworm with exogenous substances (TiO<sub>2</sub> NPs) promoted the  
176 expression of Hollween genes and increased the content of 20E [29], our results demonstrate that  
177 high temperature treatment promotes the anabolic level of 20E as well. In this study, high  
178 temperature treatment activated PI3K, resulting in phosphorylation of Akt and increased the  
179 expression of downstream BmCncC (Fig 3C), suggesting that the PI3K/Akt/BmCncC axis plays  
180 an important role in the up-regulation of Hollween genes expression under high temperature.  
181 Evidence suggests that CncC regulates the expression of the downstream P450 family genes [30].  
182 Studies shown that CncC constitute a homodimer or a heterodimer with Maf to regulate the  
183 expression of the P450 genes [31]. The CncC and Maf complex regulates the expression of P450  
184 genes by regulating the promoter activities of *CYP389B1* and *CYP392A28* genes in *Boisduval*  
185 (*Tetranychus cinnabarinus*) [32]. Inhibition of the CncC/keap1 pathway altered the  
186 metamorphosis process of the Colorado potato beetle (*Leptinotarsa decemlineata*), suggesting that  
187 the CncC/keap1 pathway plays an important role in developmental regulation [33]. Our study  
188 investigated whether BmCncC regulated the downstream 20E-synthesis P450 genes, found that  
189 the mRNA level of *cyp302a1* and *cyp306a1* was significantly down-regulated after inhibition of  
190 *BmCncC* (Fig 4), whereas significantly up-regulated after treatment with Curcumin, indicating  
191 that a regulatory relationship exists between *BmCncC* and downstream P450 (*cyp302a1*  
192 *cyp306a1*) genes. Furthermore, the mRNA levels of *cyp314a1* and *cyp315a1* were not changed  
193 significantly after activation or inhibition of *BmCncC*, implying that there is an unknown pathway  
194 of regulation.

195

196 In summary, our study demonstrated that high temperature induction can accelerate the  
197 development of silkworm, elevate the content of 20E and promote related-genes expression,  
198 indicating a regulatory relationship between *BmCncC* and downstream 20E-biosynthetic genes,  
199 *cyp302a1* and *cyp306a1* in silkworm. Our results provided new clues for further studying of the  
200 high temperature impact on insect hormone metabolism and the regulatory relationship between  
201 *CncC* and P450 family genes.

202

## 203 **Methods**

204

### 205 **Insects and treatment.**

206 The larvae of *B. mori* (Jingsong × Haoyue strain) maintained in our laboratory were reared on  
207 mulberry leaves under 12 h light/ 12 h dark conditions at  $25 \pm 1^\circ\text{C}$  with 75-85% humidity. After  
208 three days of normal rearing, the 5<sup>th</sup> instar silkworms were maintained at constant high  
209 temperature of  $36^\circ\text{C}$  and  $75 \pm 5\%$  humidity, and feed with fresh mulberry leaves.

210

### 211 **Cell culture and treatment.**

212 The BmN cells were maintained at  $27^\circ\text{C}$  in Grace insect medium, supplemented with 10% fetal  
213 bovine serum and 1% antibiotics. DsRNA of *BmCncC* was purchased from Shanghai  
214 GenePharma Co., Ltd, China. BmN cells were cultured in 12-well plates for 6 h and the medium  
215 was replaced with serum-free medium without antibiotics. Cells were transfected using  $1\mu\text{l}$  ( $20$   
216  $\mu\text{M}/\mu\text{L}$ ) siRNA mixed with LipoHigh Liposome efficient transfection reagent (Sangon, Shanghai,  
217 China) and incubated for 8 h. Cells were cultured with dsRNA for another 24 h after replacement  
218 of medium. For Curcumin treatment (final concentration  $10\mu\text{M}/\text{ml}$ ), the cells were analyzed after  
219 24 h treatment with Curcumin. All data are expressed as mean of 3 replicates.

220

### 221 **Elisa analysis.**

222 Ecdysone and juvenile hormone (JH) content were determined using a kit (MEIMIAN,  
223 Shanghai, China), refer to the instructions. The absorbance value was measured at wavelength of  
224 450 nm to calculate the sample content. All data are expressed as mean of 3 replicates.

225

### 226 **Real time-quantitative PCR (qRT-PCR) analysis.**

227 Total RNA was extracted from silkworm fat body using RNA lysate (Takara, China). Primer  
228 sequences are shown in Table 1. Use *Actin3* as the internal reference gene. QRT-PCR was  
229 performed on a ViiA 7 System (ABI, Foster City, CA, USA). The reaction was in  $20\mu\text{L}$  volume.  
230 Amplification conditions were as follows: denaturation at  $95^\circ\text{C}$  for 1 min, followed by 45 cycles  
231 of  $95^\circ\text{C}$  for 5 s,  $55^\circ\text{C}$  for 10 s, and  $72^\circ\text{C}$  for 10 s. Data are expressed as the mean of three  
232 independent experiments  $\pm$  SE (standard error).

233

### 234 **Western blotting analysis.**

235 The samples of fat body of the control and treated groups were homogenized in lysis buffer  
236 supplemented with 1 mM PMSF. The samples were centrifuged at 12000 g for 10 min, and the  
237 supernatant was collected for analysis. The procedure was carried out according to the method  
238 before [26]. The Akt, p-Akt antibodies (CST, USA, 1:2000), polyclonal antibodies for *BmCncC*,  
239 *Bmkeap1* (GenScript, Shanghai; 1:1500) were used as the primary antibody, and the



240 HRP-conjugated goat anti-rabbit IgG (CST, USA, 1:2000) was used as the secondary antibody.

241

### 242 **Statistical analysis.**

243 All data are expressed as mean of 3 replicates. The differences in means between multiple sets  
244 of data were compared by one-way ANOVA. Dunnett's test was performed when compared with  
245 the control.  $P < 0.05$  was considered significant difference.

246

### 247 **Acknowledgement**

248

249 This study was supported by the China Agriculture Research System (CARS-18-ZJ0106), the  
250 State Key Laboratory of Integrated Management of Pest Insects and Rodents (Y852981303), the  
251 Natural Science Fund project in Jiangsu Province (BK20151453), the Science & Technology  
252 support Program of Suzhou (SYN201503, SNG2017048), and a project funded by the Priority  
253 Academic Program Development of Jiangsu Higher Education Institutions. The funders had no  
254 role in study design, data collection and analysis, decision to publish, or preparation of the  
255 manuscript.

256

### 257 **References**

258

259 1. Richard Harrington, Richard A. Fleming, Ian P. Woiwod (2001) Climate change impacts on  
260 insect management and conservation in temperate regions: can they be predicted? *Agricultural and*  
261 *Forest Entomology* 3(4):233-240.

262

263 2. PC Tobin, S Nagarkatti, G Loeb, MC Saunders (2008) Historical and projected interactions  
264 between climate change and insect voltinism in a multivoltine species. *Global Change Biology*  
265 14:951–957.

266

267 3. Brown, Clarke, Whittaker, Hollier (1998) Direct and indirect effects of climate change on insect  
268 herbivores: Auchenorrhyncha (Homoptera). *Ecological Entomology* 23 (1) :45–52.

269

270 4. M Van Asch, P Tienderen, L Holleman, M Visser (2007) Predicting adaptation of phenology in  
271 response to climate change, an insect herbivore example. *Global Change Biology*  
272 13(8):1596-1604.

273

274 5. EH Delucia, PD Nabity, JA Zavala, MR Berenbaum (2012) Climate change: resetting  
275 plant-insect interactions. *Plant Physiology* 160(4):1677.

276

277 6. N Sigrid, S Axel (2010) Potential effects of climate change on insect herbivores in European  
278 forests—General aspects and the pine processionary moth as specific example. *Forest Ecology &*  
279 *Management* 259(4):831-838.

280

281 7. Gong Y, Li L, Gong D, Yin H, Zhang J (2016) Biomolecular evidence of silk from 8,500  
282 years ago. *PLoS One*. 11. e0168042.

283

- 284 8. Gu Z, Sun S, Wang Y, Wang B, Xie Y, et al. (2013) Transcriptional characteristics of gene  
285 expression in the midgut of domestic silkworms (*Bombyx mori*) exposed to phoxim. Pestic  
286 Biochem Physiol. 105:36-43.  
287
- 288 9. Li JX, Xue B, Cheng XY, Hu JS, Tian JH, et al. (2018) TiO<sub>2</sub> NPs Alleviates High-Temperature  
289 Induced Oxidative Stress in Silkworms. Journal of Economic Entomology 111(2): 879–884.  
290
- 291 10. AH MIR, AQAMAR (2012) Effects of Starvation and Thermal Stress on the Thermal  
292 Tolerance of Silkworm, *Bombyx mori*: Existence of Trade-offs and Cross-Tolerances. Neotrop  
293 Entomol 13744-017-0559-2.  
294
- 295 11. Motohashi H, Yamamoto M (2004) Nrf2-Keap1 defines a physiologically important stress  
296 response mechanism. Trends Mol. Med 10(11):549-57.  
297
- 298 12. Rushmore TH, Morton MR, Pickett CB. (1991) The antioxidant responsive element.  
299 Activation by oxidative stress and identification of the DNA consensus sequence required for  
300 functional activity. J Biol Chem 266(18): 11632-11639.  
301
- 302 13. Kobayashi A, Kang MI, Okawa H, Ohtsuji M, Zenke Y, et al. (2004) Oxidative Stress  
303 Sensor Keap1 Functions as an Adaptor for Cul3-Based E3 Ligase to Regulate Proteasomal  
304 Degradation of Nrf2. Mol Cell Biol 24(16): 7130-7138.  
305
- 306 14. Chowdhry S, Zhang Y, McMahon M, Sutherland C, Cuadrado A, et al. (2013) Nrf2 is  
307 controlled by two distinct  $\beta$ -TrCP recognition motifs in its Neh6 domain, one of which can be  
308 modulated by GSK-3 activity. Oncogene 32(32): 3765-3781.  
309
- 310 15. Xue F, Huang JW, Ding PY, Zang HG, Kou ZJ, et al. (2016) Nrf2/antioxidant defense  
311 pathway is involved in the neuroprotective effects of Sirt1 against focal cerebral ischemia in rats  
312 after hyperbaric oxygen preconditioning. Behav Brain Res. 309-1.  
313
- 314 16. Bergé JB, Feyereisen R, Amichot M (1998) Cytochrome P450 monooxygenases and  
315 insecticide resistance in insects. Philos Trans R Soc Lond B Biol Sci 353:1701-5.  
316
- 317 17. Megha K, Subba RP. (2017) Transcription factor cap n collar C regulates multiple  
318 cytochrome P450 genes conferring adaptation to potato plant allelochemicals and resistance to  
319 imidacloprid in *Leptinotarsa decemlineata* (Say). Insect Biochemistry and Molecular Biology 83:  
320 1e12.  
321
- 322 18. Li FC, Ni M, Zhang H, Wang BB, Xu KZ, et al. (2015) Expression profile analysis of  
323 silkworm P450 family genes after phoxim induction. Pesticide Biochemistry and Physiology 122:  
324 103-109.  
325
- 326 19. Ai JW, Zhu Y, Duan J, Yu QY, Zhang GJ, et al. (2011) Genome-wide analysis of cytochrome  
327 P450 monooxygenase genes in the silkworm, *Bombyx mori*. Gene 480: 42–50.



328

329 20. Jaramillo J, Chabiolaye A, Kamonjo C, Jaramillo A, Vega FE. (2009) Thermal Tolerance  
330 of the Coffee Berry Borer *Hypothenemus hampei*: Predictions of Climate Change Impact on a  
331 Tropical Insect Pest. Plos One 4(8): e6487.

332

333 21. Bale JS, Masters GJ, Hodkinson ID, Awmack C, Bezemer TM (2002) Herbivory in global  
334 climate change research: direct effects of rising temperature on insect herbivores. Global Change  
335 Biology 8(1):1–16.

336

337 22. Hu JS, Chen J, Wang H, Mao TT, Li JX, et al. (2018) Cloning and Functional Analysis of  
338 CncC and Keap1 Genes in Silkworm. J Agric Food Chem. 66: 2630–2636.

339

340 23. Saito K, Su ZH, Emi A, Mita K, Takeda M. (2010). Cloning and expression analysis of  
341 takeout/JHBP family genes of silkworm, *Bombyx mori*. Insect Molecular Biology. 15  
342 (3) :245-251.

343

344 24. Li ZQ, Cheng DJ, Wei L, Zhao P, Shu X, et al. (2010) The silkworm homolog of  
345 Methoprene-tolerant (Met) gene reveals sequence conservation but function divergence. Insect  
346 Science 17 (4) :313-324.

347

348 25. Hu Q, Zhu Z, Li C, Feng Q, Deng H. (2016) Gene Cloning and Expression Analysis of  
349 Transcription Factor BmKr-h1 in Juvenile Hormone Signaling Pathway of Silkworm (*Bombyx*  
350 *mori*). Science of Sericulture.

351

352 26. Muramatsu D, Kinjoh T, Shinoda T, Hiruma K. (2008) The role of 20-hydroxyecdysone and  
353 juvenile hormone in pupal commitment of the epidermis of the silkworm, *Bombyx mori*.  
354 Mechanisms of Development. 125 (5-6):411-420.

355

356 27. Li K, Tian L, Guo Z, Guo S, Zhang J, et al. (2016) 20-Hydroxyecdysone (20E) Primary  
357 Response Gene E75 Isoforms Mediate Steroidogenesis Autoregulation and Regulate  
358 Developmental Timing in *Bombyx*. Journal of Biological Chemistry. 291 (35) :18163.

359

360 28. Alexandra C, Stephane F, Gaëlle LG, Philippe F, Yves A, et al. (2008) Role of  
361 CYTOCHROME p450 in the perception of caffeine in *Drosophila melanogaster*. PLOS  
362 ONE 236 (1) :261-272.

363

364 29. Balarabe R, Mohammed C, Wilding P, Collier J, Yusu Y. Deeni. (2014) Bioinformatic  
365 analysis of regulatory elements within the promoter region of the cytochrome P450 Gene,  
366 CYP6M2 in *Anopheles gambiae*. European Journal of Biotechnology and Bioscience 2 (1): 24-31.

367

368 30. Peng T, Pan Y, Gao X, Xi J, Zhang L. (2016) Cytochrome P450 CYP6DA2 regulated by cap  
369 'n'collar isoform C (CncC) is associated with gossypol tolerance in *Aphis gossypii* Glover. Insect  
370 Molecular Biology 25(4):450-459.

371

- 372 31. Li S, Wang MY, Zhang YC, Shen GM, Di HS, et al. (2017) The expression of P450 genes  
 373 mediating fenpropathrin resistance is regulated by CncC and Maf in *Tetranychus cinnabarinus*  
 374 (Boisduval). Comparative Biochemistry and Physiology, Part C 198: 28–36.  
 375
- 376 32. Sharath C, Gaddelapati M, Kalsi A, Subba R. (2018) Cap 'n' collar C regulates genes  
 377 responsible for imidacloprid resistance in the Colorado potato beetle, *Leptinotarsa decemlineata*.  
 378 Insect Biochemistry and Molecular Biology 99: 54-62.  
 379
- 380 33. Megha K, Subba R. (2015) Transcription factors, CncC and Maf, regulate expression of  
 381 CYP6BQ genes responsible for deltamethrin resistance in *Tribolium castaneum*. Insect  
 382 Biochemistry and Molecular Biology 65: 47e56.  
 383

384 **Table 1. Primer sequences used in qRT-PCR**

| Gene name       | Primer sequence (5'-3')                                  |
|-----------------|----------------------------------------------------------|
| <i>Actin3</i>   | F: CGGCTACTCGTTCCTACTACC<br>R: CCGTCGGAAGTTCGTAAG        |
| <i>Met</i>      | F: ACTCGTCGCAGCCAGTAC<br>R: CGTGTTCGTTACGCAGTT           |
| <i>JH-3</i>     | F: ACGCTTTACTGATTTAGATAGG<br>R: ACATTAACAACAGCACCACAA    |
| <i>Kr-h1</i>    | F: GTGGCTCATTGACTATGTAATCTAA<br>R: ATGTATCCAATTCCACCTCCT |
| <i>USP</i>      | F: ATGGCTGAACATAGAGTCAG<br>R: TCAAGGGATGGTTAGGG          |
| <i>Br-C</i>     | F: GATCGCTGCACGGATGACA<br>R: GGGCGGAATGAATGGTGAG         |
| <i>E75</i>      | F: AGTCGTCCCGAGGTATCTTT<br>R: GCCAAGTCTGCGTACTCTTT       |
| <i>E93</i>      | F: ACATTACCTGATTTACGCACTT<br>R: GCTGATTCTCCACTACGG       |
| <i>PI3K</i>     | F: GACACTCGTGATGGAACCTTTT<br>R: ACTTATTTGCACCACCTTTC     |
| <i>Akt</i>      | F: ACTTCGGACTATGCAAGGTGAA<br>R: GCGGGACCATAATCGGAGTC     |
| <i>CncC</i>     | F: CATGGACGAGTTCAACGAGAG<br>R: GCGAGCGAGGTTATCTGGT       |
| <i>Keap1</i>    | F: ATGACCTGCCTCCGATTAGT<br>R: TCCAACCTCCAACACGACATC      |
| <i>Maf</i>      | F: TAGTCACGGTGGAGCAAGG<br>R: GCTGTGGCATCTCGGATTC         |
| <i>Cyp302a1</i> | F: CGATACAACAGCCTACACGAC<br>R: AACGTCAGCGGTTATCTCATC     |

|                 |                           |
|-----------------|---------------------------|
| <i>Cyp306a1</i> | F: ATCAACCAGGGCTACGCT     |
|                 | R: CTCCACGATCCTCGATAAG    |
| <i>Cyp314a1</i> | F: TTTGGGACCTTATTTGCTCG   |
|                 | R: TCTTTCGTTGATCGTTCCTGTC |
| <i>Cyp315a1</i> | F: GCCCTCAGCCTCTTCCCTT    |
|                 | R: GCGTCGTCTCCATGAACACT   |

385

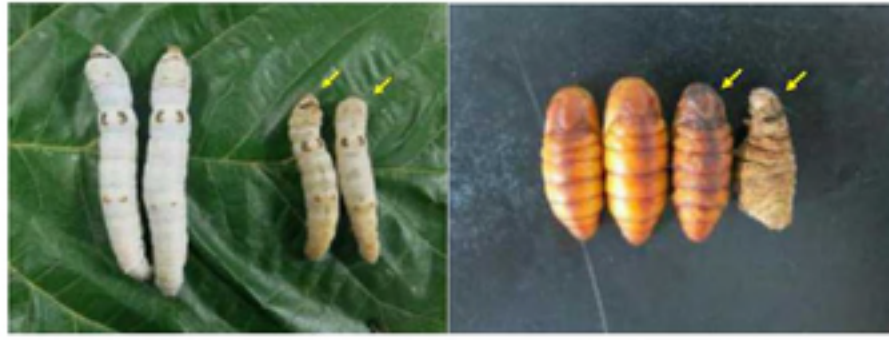

1  
2

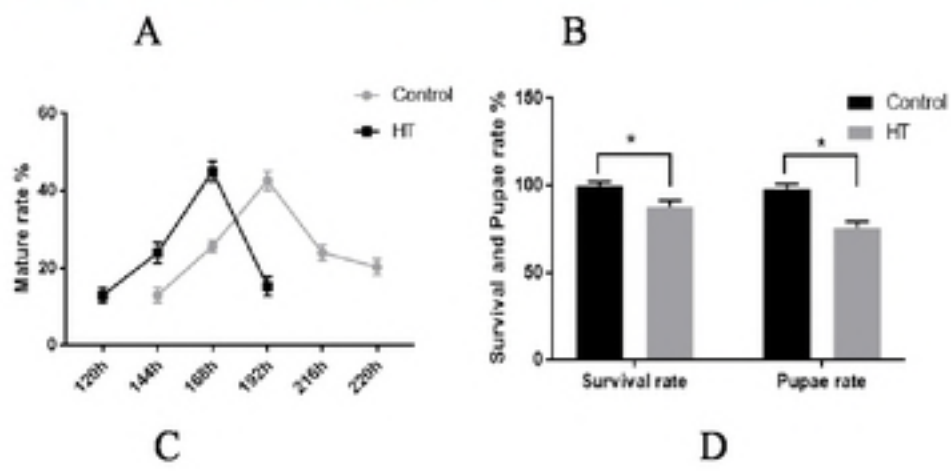

3  
4

bioRxiv preprint doi: <https://doi.org/10.1101/458620>; this version posted October 31, 2018. The copyright holder for this preprint (which was not certified by peer review) is the author/funder, who has granted bioRxiv a license to display the preprint in perpetuity. It is made available under aCC-BY 4.0 International license.

6 **Fig 1. Effect of HT on the development and vitality of *B. mori*.** A. Effect of HT on the larvae of  
 7 silkworm. B. Effect of HT on the development of pupa. C. Effect of HT on silkworm duration of  
 8 developmental stage. D. Effect of HT on silkworm vitality and percentage of pupation. HT: High  
 9 Temperature. The experiment was repeated three times independently. The results were shown to  
 10 be the mean values, and the significant differences were expressed by \* ( $P \leq 0.05$ ).

11  
12  
13  
14  
15  
16  
17  
18  
19  
20  
21  
22  
23  
24  
25  
26  
27  
28  
29  
30  
31  
32  
33
